# Supplementary material
Source: Springer Nature journal article supplement (https://www.springermedizin.de/resource/supplementary/12885_2011_2655_MOESM1_ESM.pdf/9461674)

No growth

Minimal growth

Sufficient growth

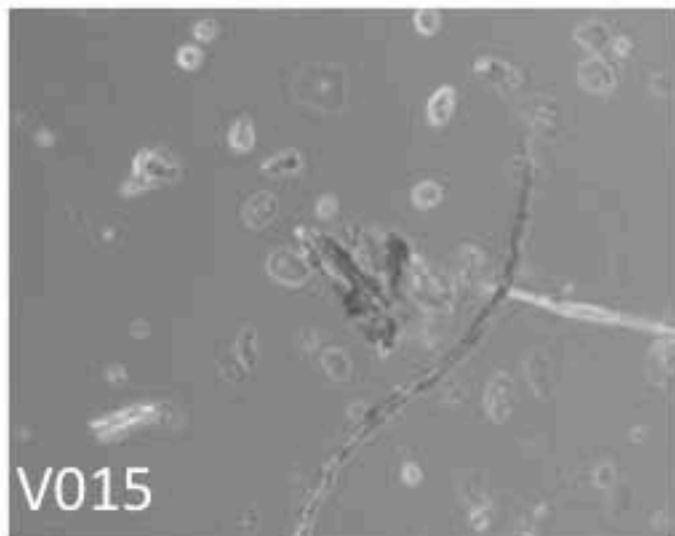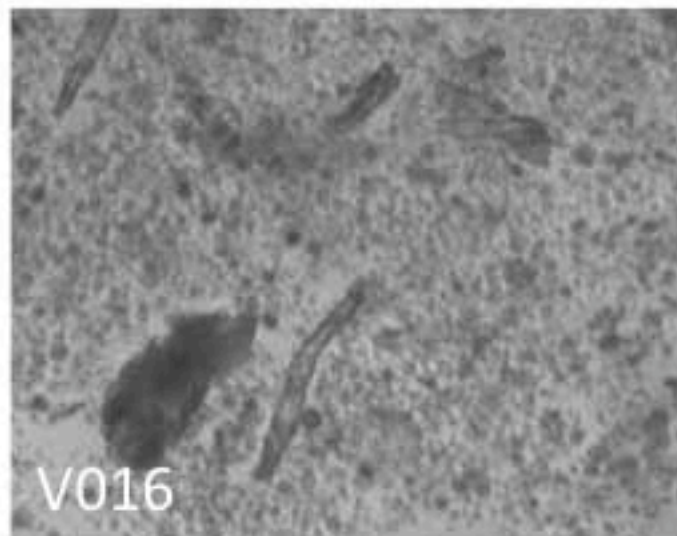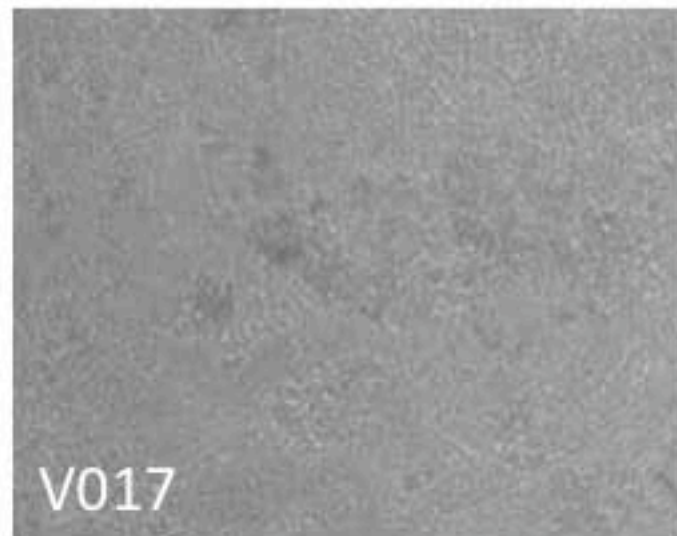

Day 0

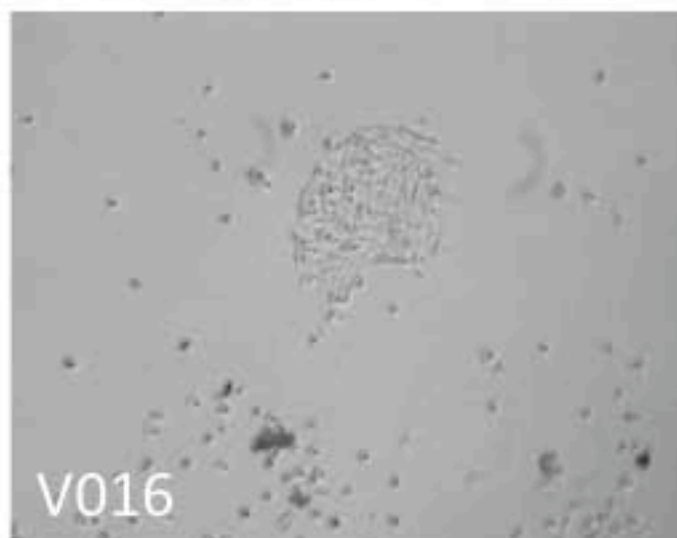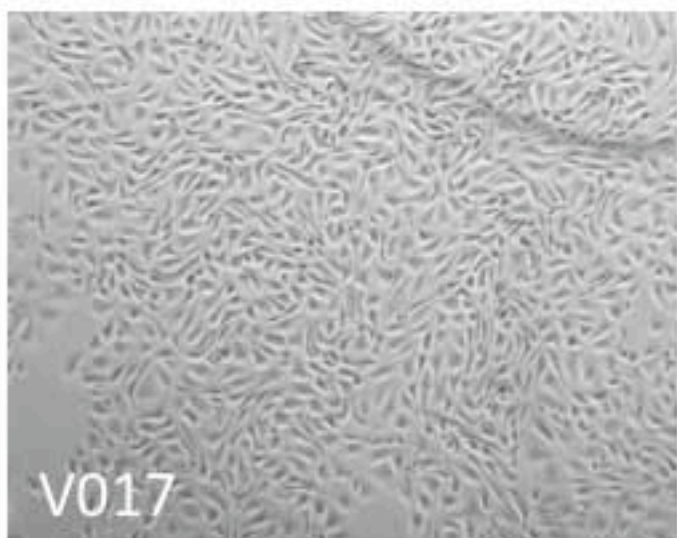

Day 10

Supplement: MOESM1 [file 9461674]
